# Supplementary material
Source: Royal Society of Chemistry journal article supplement (doi:10.1039/d5tb02515j)
Supplement: d5tb02515j1.pdf [file d5tb02515j1.pdf]

## Supporting Information

# Amylase-Responsive Bilayer Film for Sustained Enzyme Delivery and ROS-Scavenging Therapy in Oral Ulcer Treatment

Xiaoqing Liu<sup>a</sup>, Qianer Zhu<sup>a</sup>, Sen Lin<sup>a</sup>, Xiaohui Liu, Weiqiang Pan, Chengzhen Liu<sup>\*</sup>

*College of Life Sciences, Institute of Biomedical Engineering, Qingdao University,  
Qingdao 266071, Shandong, China*

### AUTHOR INFORMATION

All authors have approved the final version of this manuscript.

<sup>a</sup>These authors contributed equally to this work.

<sup>\*</sup>To whom correspondence should be addressed: Chengzhen Liu  
([liuchengzhen2014@163.com](mailto:liuchengzhen2014@163.com)).

## Results

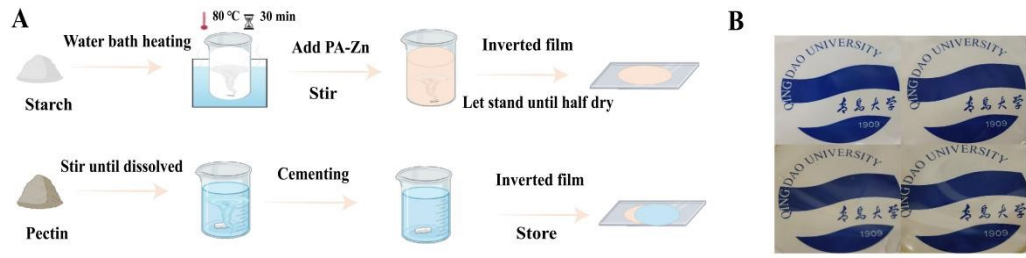

**Figure S1.** Preparation of PZ/SP (A), and optical image (B) of films.

**Table S1.** Color analysis of SP, PZ<sup>2</sup>/SP, PZ<sup>4</sup>/SP, and PZ<sup>6</sup>/SP

| Group               | K/S                      | L                         | a                        | b                         |
|---------------------|--------------------------|---------------------------|--------------------------|---------------------------|
| SP                  | 0.16 ± 0.01 <sup>e</sup> | 86.39 ± 0.28 <sup>a</sup> | 2.24 ± 0.02 <sup>c</sup> | 2.39 ± 0.20 <sup>e</sup>  |
| PZ <sup>2</sup> /SP | 0.36 ± 0.03 <sup>d</sup> | 84.05 ± 0.70 <sup>b</sup> | 0.64 ± 0.21 <sup>e</sup> | 13.16 ± 0.31 <sup>c</sup> |
| PZ <sup>4</sup> /SP | 0.50 ± 0.04 <sup>c</sup> | 81.30 ± 0.80 <sup>c</sup> | 0.90 ± 0.29 <sup>d</sup> | 15.20 ± 1.05 <sup>b</sup> |
| PZ <sup>6</sup> /SP | 1.01 ± 0.05 <sup>b</sup> | 77.30 ± 0.39 <sup>d</sup> | 2.71 ± 0.08 <sup>b</sup> | 21.03 ± 0.60 <sup>a</sup> |

**Table S2.** Analysis of water permeability, oxygen permeability, thickness, water content, solubility and expansion performance of SP, PZ<sup>2</sup>/SP, PZ<sup>4</sup>/SP, PZ<sup>6</sup>/SP

| Group               | Thickness(mm)            | Moisture content (%)      | Solubility(%)             | Swellability(%)          | WVP*10 <sup>-12</sup> (g/cm h Pa) | OP (cm <sup>3</sup> /m <sup>2</sup> *min) |
|---------------------|--------------------------|---------------------------|---------------------------|--------------------------|-----------------------------------|-------------------------------------------|
| SP                  | 0.09 ± 0.03 <sup>a</sup> | 24.96 ± 0.73 <sup>a</sup> | 97.18 ± 0.78 <sup>a</sup> | 1.67 ± 0.07 <sup>a</sup> | 5.99 ± 0.03 <sup>a</sup>          | 6.70 ± 0.11 <sup>a</sup>                  |
| PZ <sup>2</sup> /SP | 0.11 ± 0.12 <sup>a</sup> | 21.15 ± 0.67 <sup>b</sup> | 97.05 ± 0.50 <sup>a</sup> | 1.65 ± 0.08 <sup>a</sup> | 5.68 ± 0.05 <sup>b</sup>          | 5.96 ± 0.09 <sup>b</sup>                  |
| PZ <sup>4</sup> /SP | 0.13 ± 0.05 <sup>a</sup> | 17.97 ± 0.88 <sup>c</sup> | 96.89 ± 0.45 <sup>a</sup> | 1.64 ± 0.06 <sup>a</sup> | 5.40 ± 0.09 <sup>c</sup>          | 5.33 ± 0.14 <sup>c</sup>                  |
| PZ <sup>6</sup> /SP | 0.15 ± 0.04 <sup>a</sup> | 15.56 ± 0.37 <sup>d</sup> | 96.71 ± 0.71 <sup>a</sup> | 1.63 ± 0.02 <sup>a</sup> | 5.06 ± 0.10 <sup>d</sup>          | 4.74 ± 0.18 <sup>d</sup>                  |

**Table S3.** Cumulative loss and apparent retention rates of PA-Zn loaded PZ/SP bilayer films after 150 min of simulated salivary rinsing

| Group               | Initial loading capacity(mg) | Cumulative loss volume(mg) | Apparent retention rate(%) |
|---------------------|------------------------------|----------------------------|----------------------------|
| PZ <sup>2</sup> /SP | 10.0                         | 0.073 ± 0.012 <sup>b</sup> | 99.27 ± 0.12 <sup>b</sup>  |
| PZ <sup>4</sup> /SP | 20.0                         | 0.062 ± 0.015 <sup>b</sup> | 99.69 ± 0.08 <sup>a</sup>  |

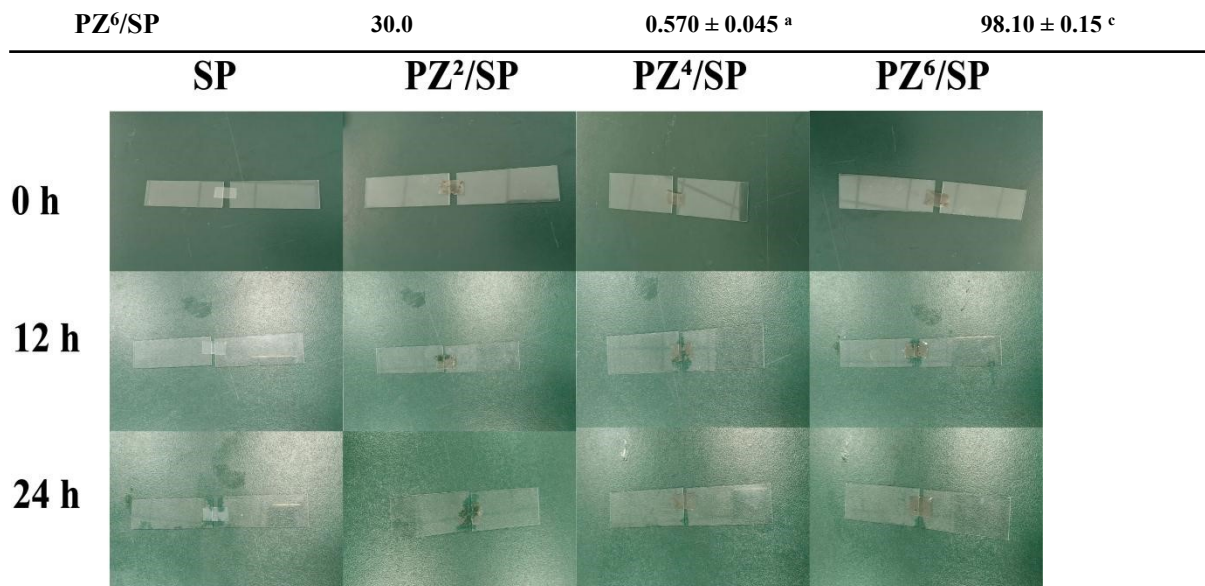

**Figure S2.** Structural integrity and interfacial stability of PZ/SP bilayer films in simulated saliva. Representative photographs at 0, 12, and 24 h immersion showing no delamination across all PA-Zn loadings.

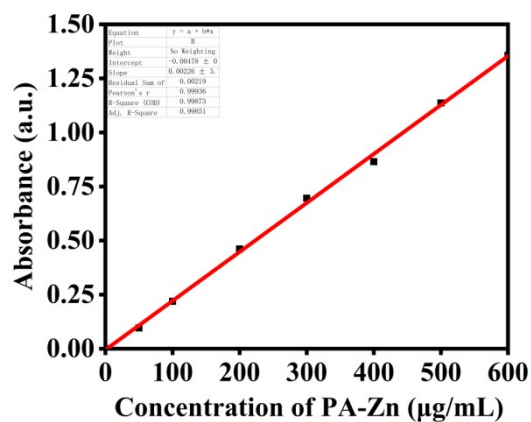

**Figure S3.** Standard curve of nanoenzyme absorbance with different standard concentrations.

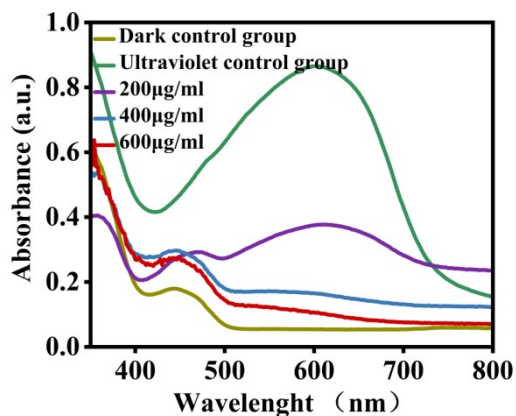

**Figure S4.** SOD enzyme-like activity of pure PA-Zn enzyme solution at different concentrations.

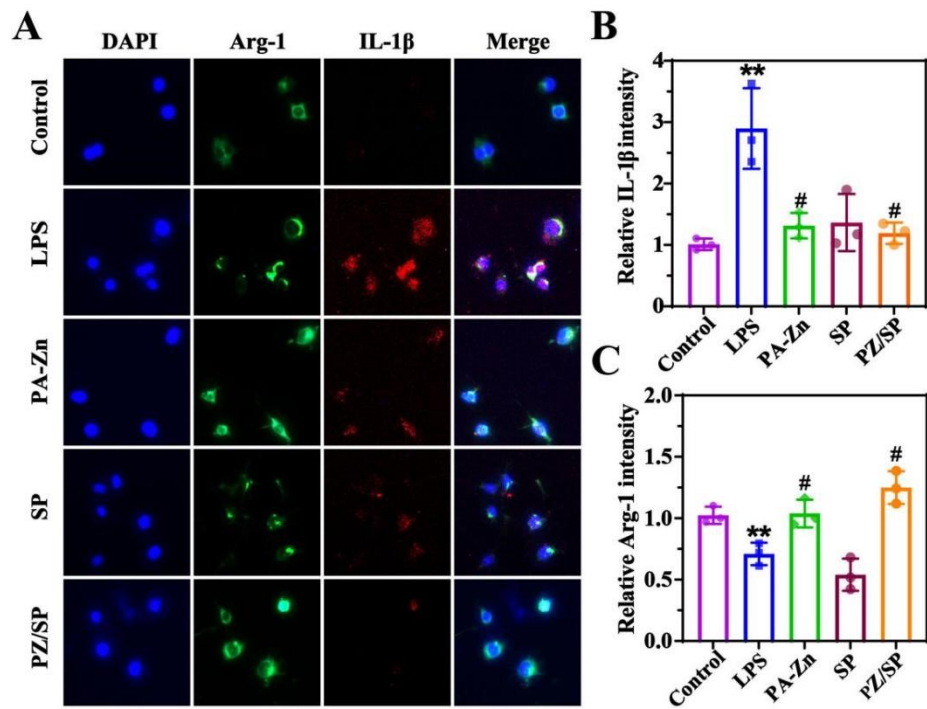

**Figure S5.** PZ/SP bilayer film induces in vitro polarization of RAW264.7 cells. Immunofluorescence images of IL-1 $\beta$  and Arg-1 in incubated macrophages (A) versus a representative analysis of Arg-1 (B) and IL-1 $\beta$  (C). Among them, \* is compared with the blank group, \*\*  $P < 0.01$ , \*\*\*  $P < 0.001$ , # is compared with the injury group, #  $P < 0.005$ , #  $P < 0.01$ . Data presented as mean  $\pm$  SD. (n = 3 /group).
